# Supplementary material for: Auto-organization of nanostructured organic–inorganic hybrid xerogels prepared from planar precursors by sol–gel processing
Source: Royal Society of Chemistry journal article supplement (doi:10.1039/b405008h), 2004-01-01
Supplement: b405008h.doc [file b405008h.doc]

Supplementary Material for Journal of Materials Chemistry

This journal is © The Royal Society of Chemistry 2004

Unsuccessful attempts for synthesis of **PR**
